# Supplementary material for: Evaluation of a Pseudoceramide Moisturizer in Patients with Mild-to-Moderate Atopic Dermatitis
Source: Springer Nature journal article supplement (doi:10.1007/s13555-014-0048-z), 2014-03-11
Supplement: MOESM1 [file 9271022]

- Evaluation of the efficacy and safety of a pseudoceramide-containing moisturizer as maintenance therapy in 40 patients with atopic dermatitis.
- Prospective, single-arm, open-label clinical trial.
- Significant improvement in disease severity was seen after 4 weeks of therapy.
- The moisturizer was well tolerated with no serious adverse events recorded.

This summary slide represents the opinions of the authors. Sponsorship and article processing charges for this study was funded by Kao Corporation (Tokyo, Japan) . For a full list of acknowledgments and conflicts of interest for all authors of this article, please see the full text online. Copyright © The Authors 2014. Creative Commons Attribution Noncommercial License (CC BY-NC).
